# Supplementary material for: Nile floods reveal Ancient Egypt's pattern of revolts
Source: Research Square preprint supplement (doi:10.21203/rs.3.rs-6968703/v1), 2025-06-26
Supplement: Supplementary file 1 [file 9f6d7b999ca33cf75d160038.docx]

**Extended Data**

**
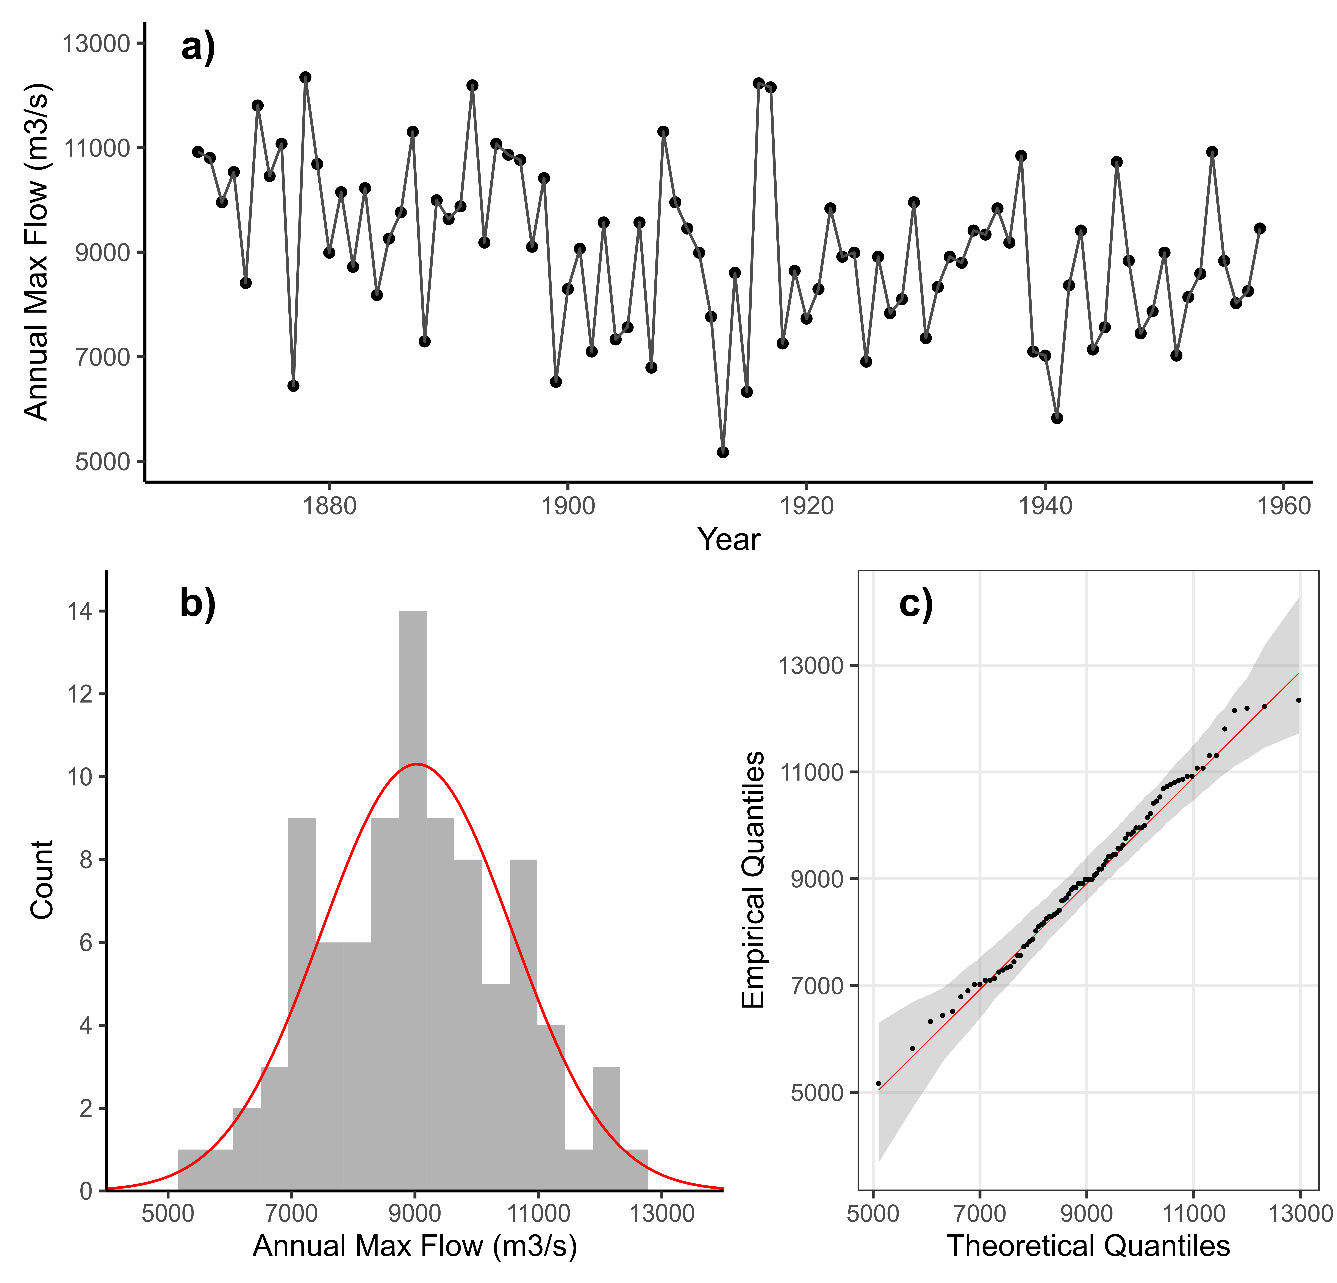
**

**Fig. E1.** Historical time series of annual flow maxima (a), developed by taking the larger value between Aswan and Dongola gauges. Annual maxima were used to fit a normal distribution (b), shown in red against observed values, shown as a grey histogram. Quantile-quantile plots (c) confirm that the normal distribution provides a good fit.

**
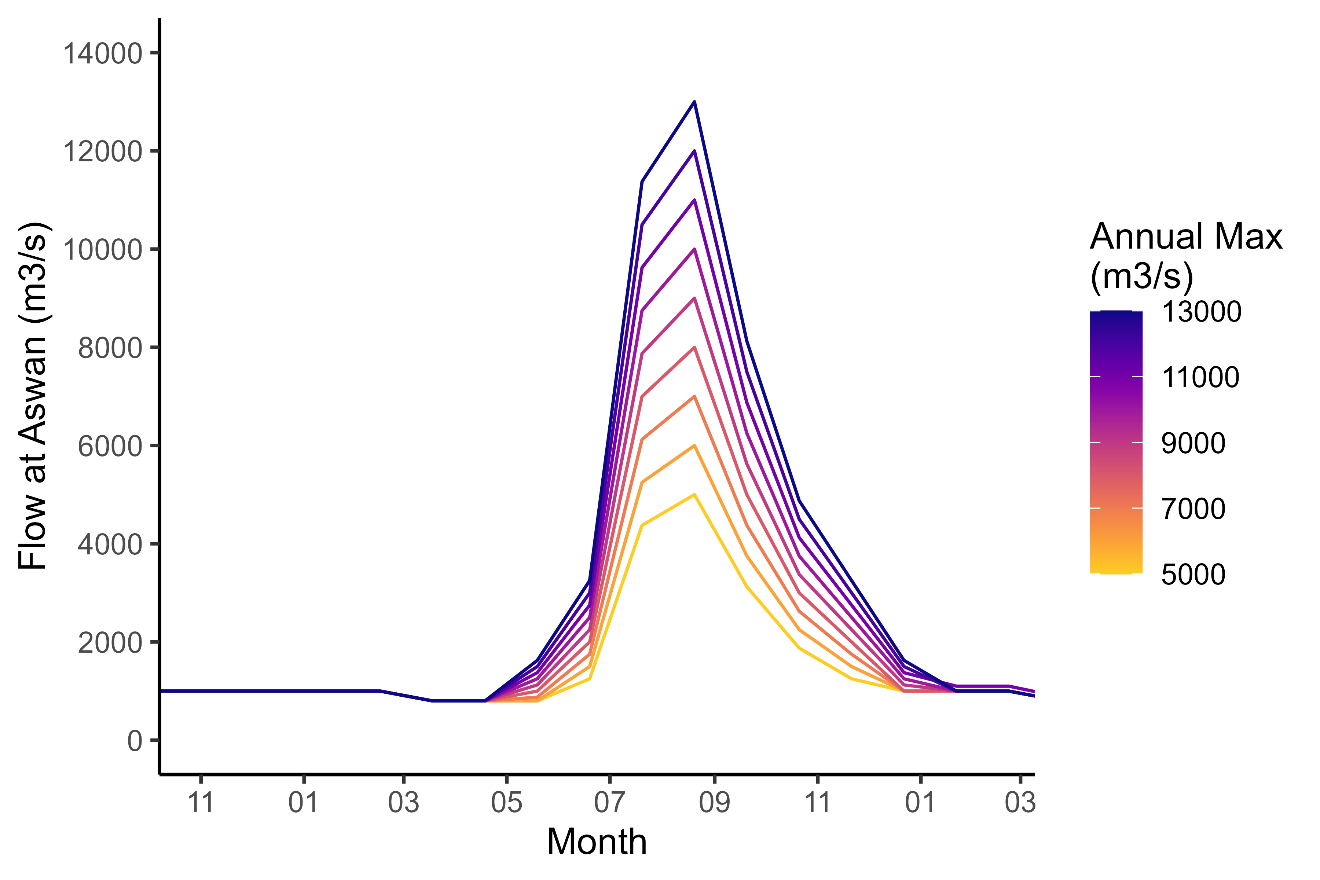
**

**Fig. E2.** Synthetic flood events used for simulation, with annual maxima ranging from 5,000 m3/s to 13,000 m3/s, represented by colors. A constant 1,000 m3/s warm up period was used to initialize the model year.


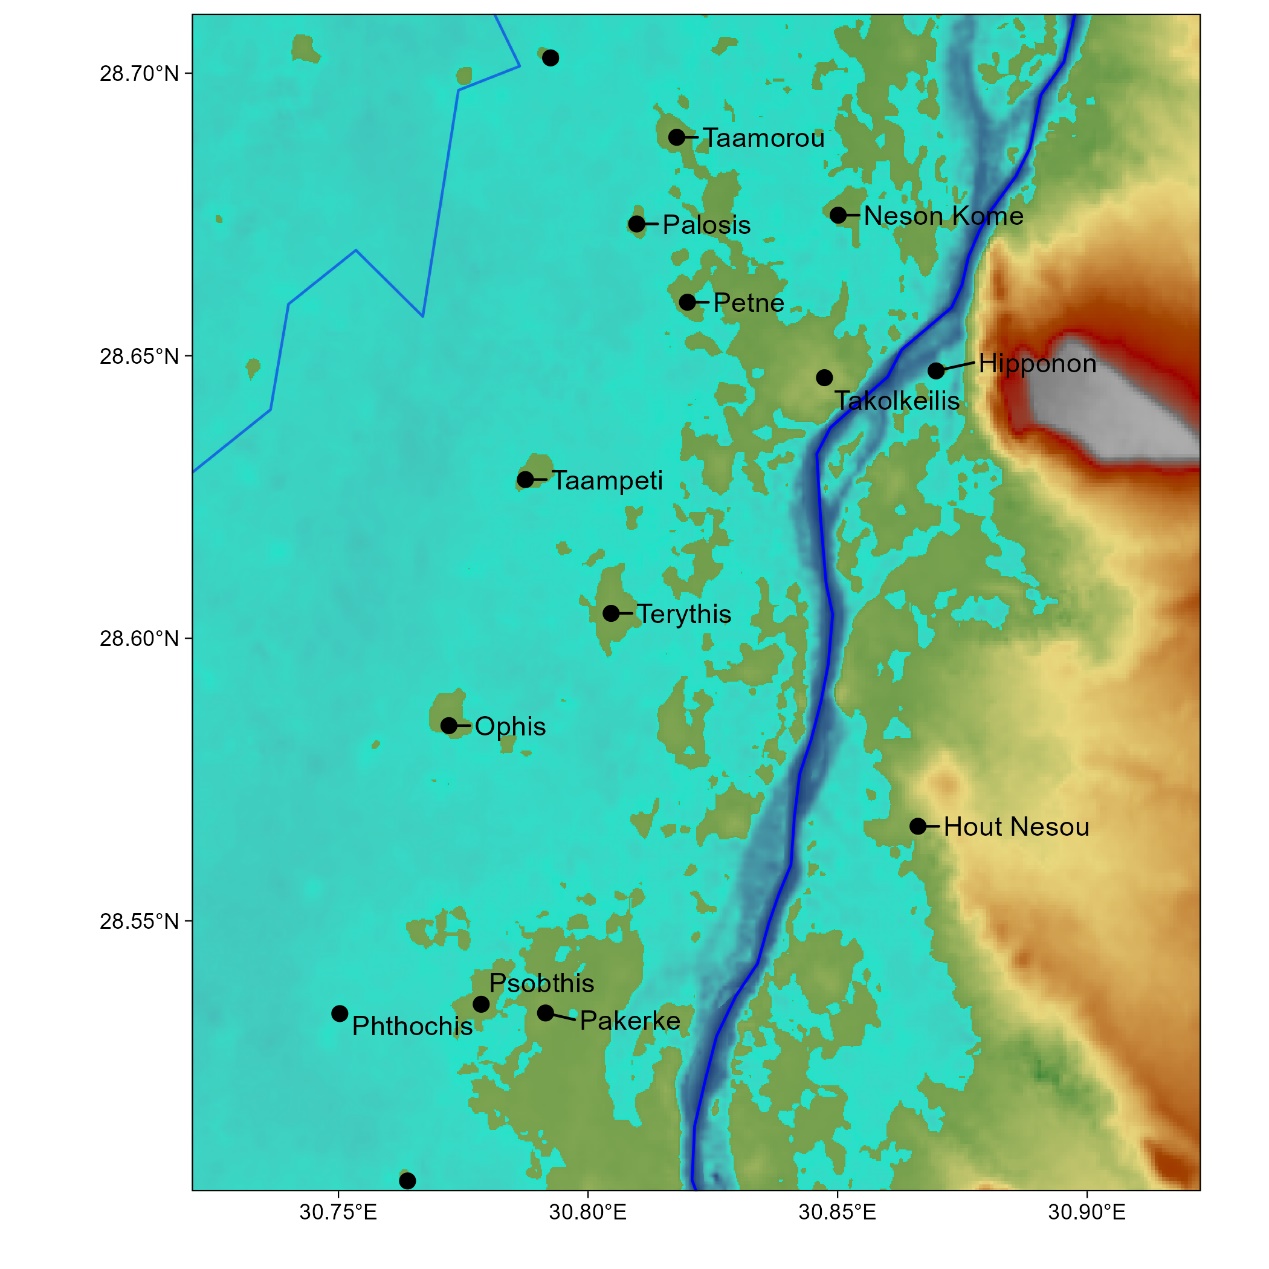


**Fig. E3.** Similar to Fig. 2, but showing a new location in Middle Egypt. Blue regions show the maximum flood extent associated with the simulated 9,000 m3/s seasonal peak, representing a typical year’s pre-modern flood. Most Ptolemaic-era villages, towns, and cities, shown as labeled dots, remain outside a typical flood extent.

**
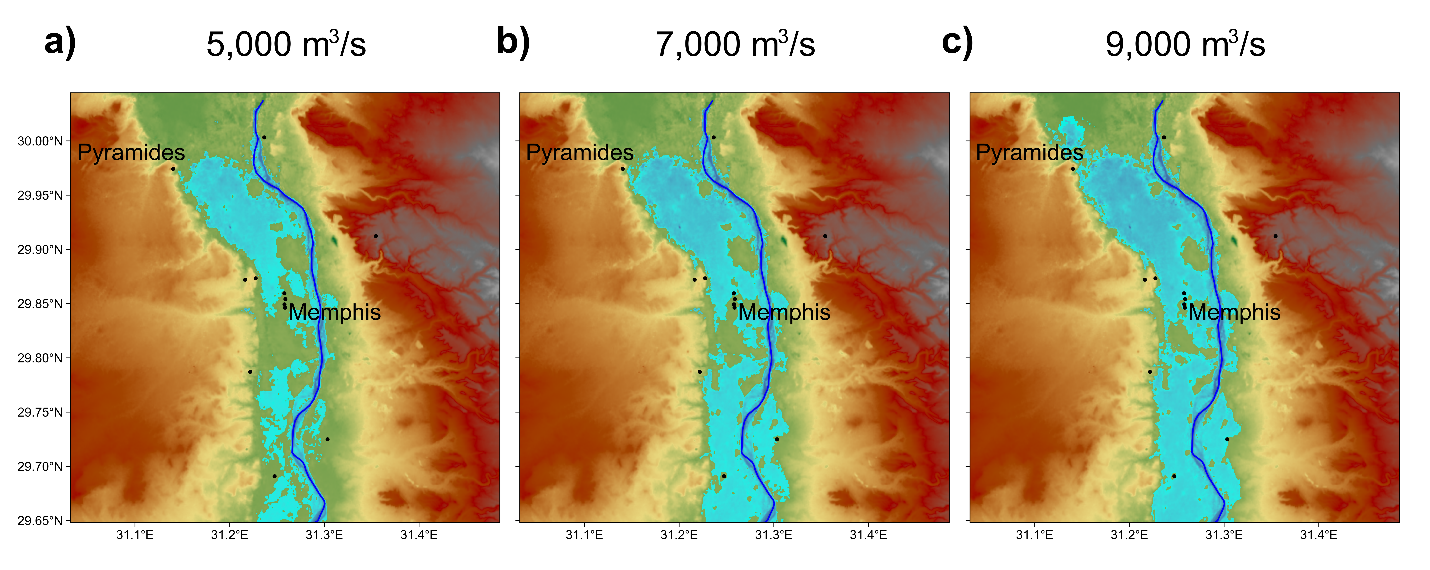
**

**Fig. E4.** Similar to Fig. 3, showing the northernmost region around Memphis.

**
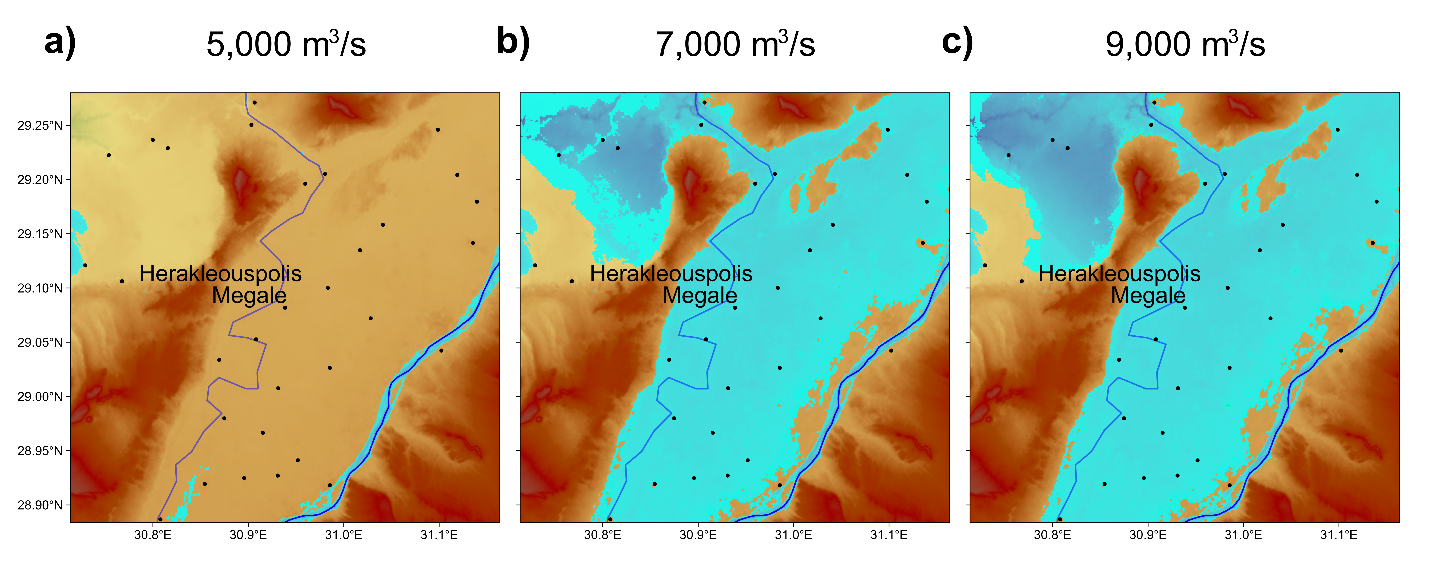
**

**Fig. E5.** Similar to Fig. 3, showing the region around Herakleouspolis Megale, near the mouth of the Fayum. Bahr Yussef is shown to the west as a blue line.

**
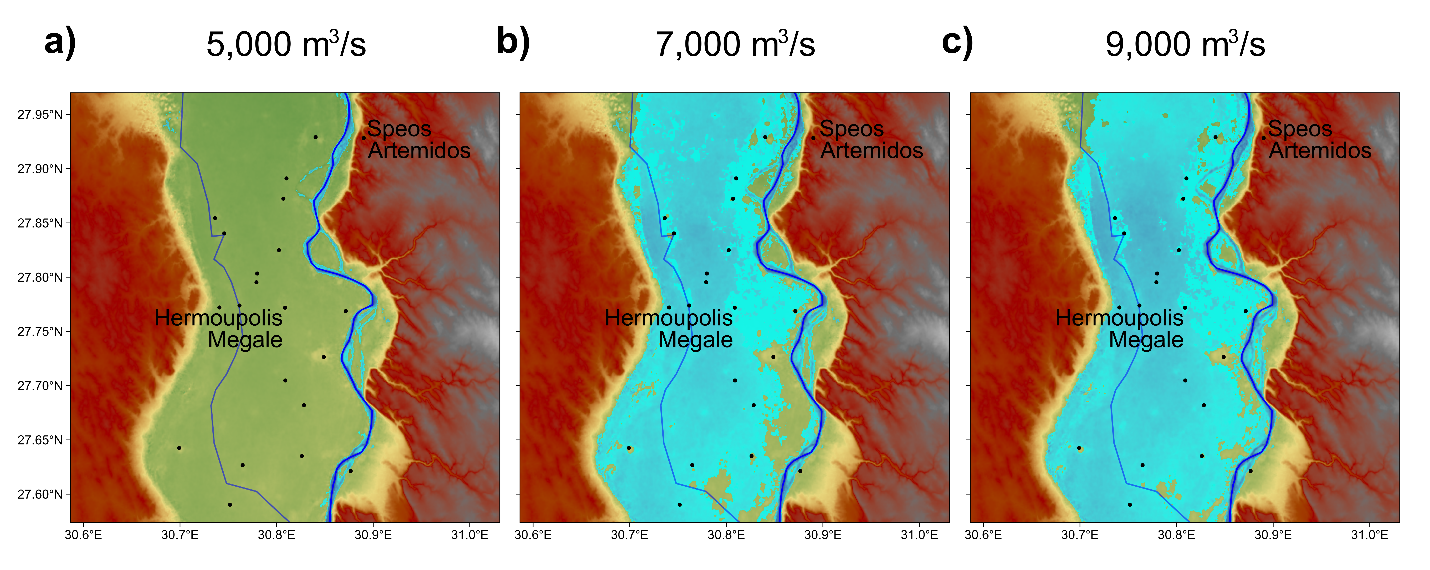
**

**Fig. E6.** Similar to Fig. 3, showing the region around Hermoupolis Megale, near the connection between the Bahr Yussef and the Nile.

**
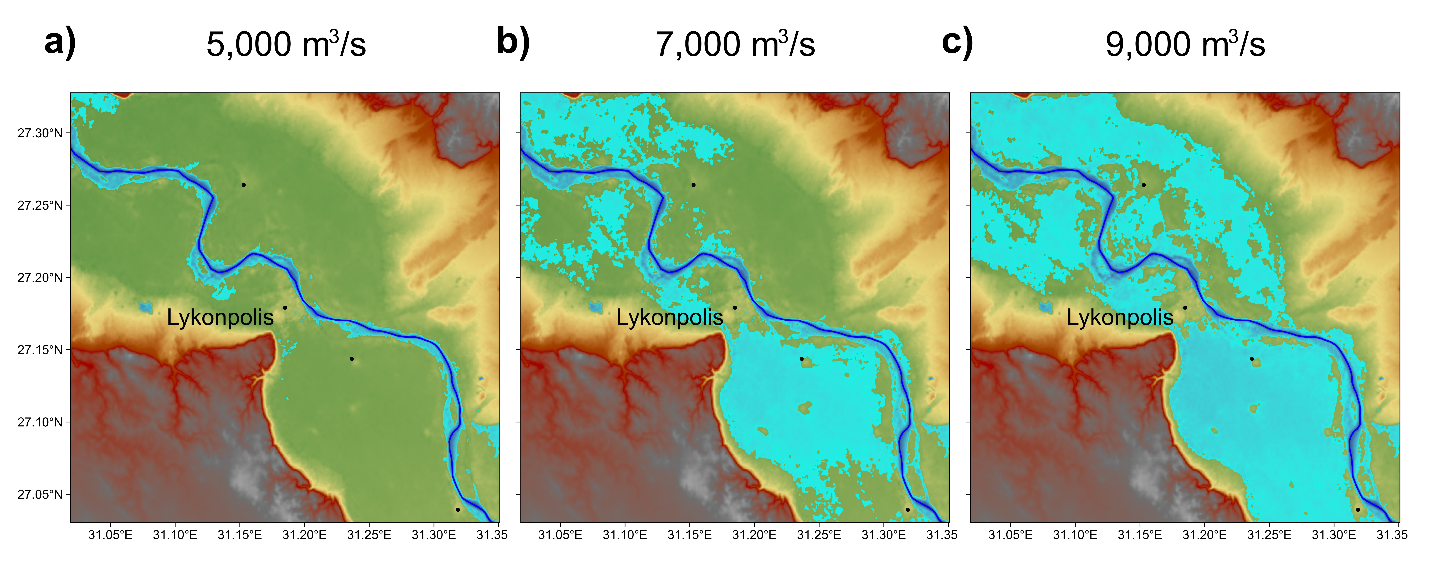
**

**Fig. E7.** Similar to Fig. 3, showing the region around Lykonpolis, modern day Asyut.

**
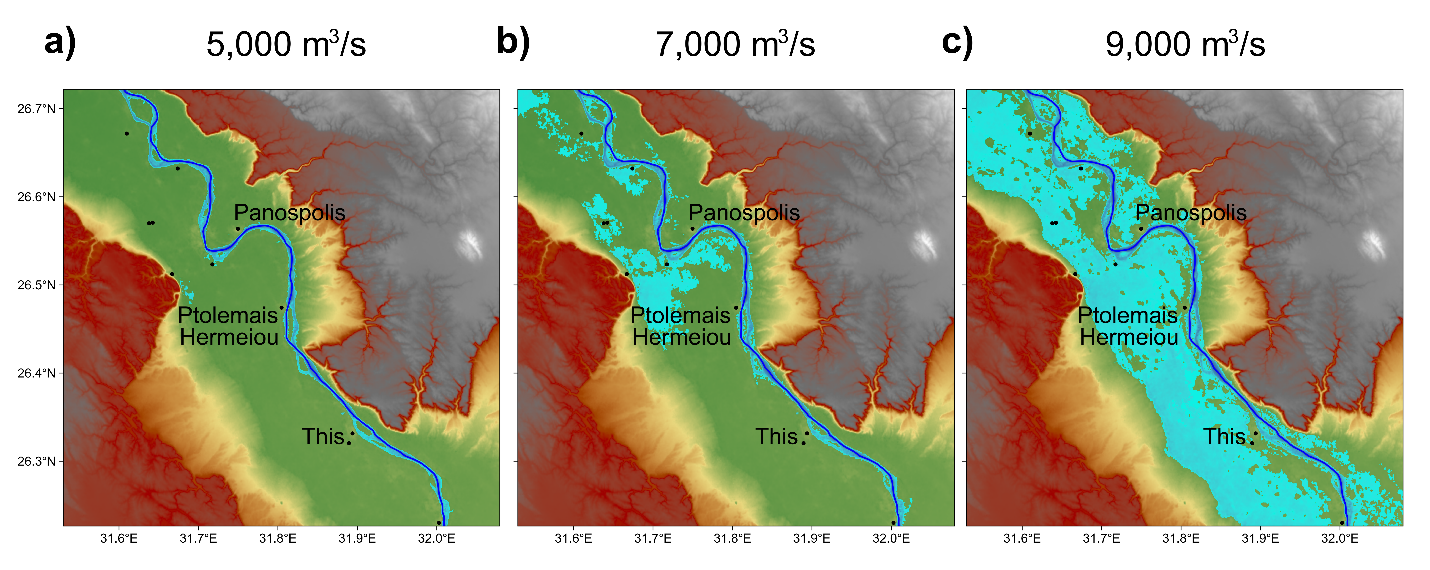
**

**Fig. E8.** Similar to Fig. 3, showing the region around Ptolemais Hermeiou, administrative capital of the Thebaid.

**
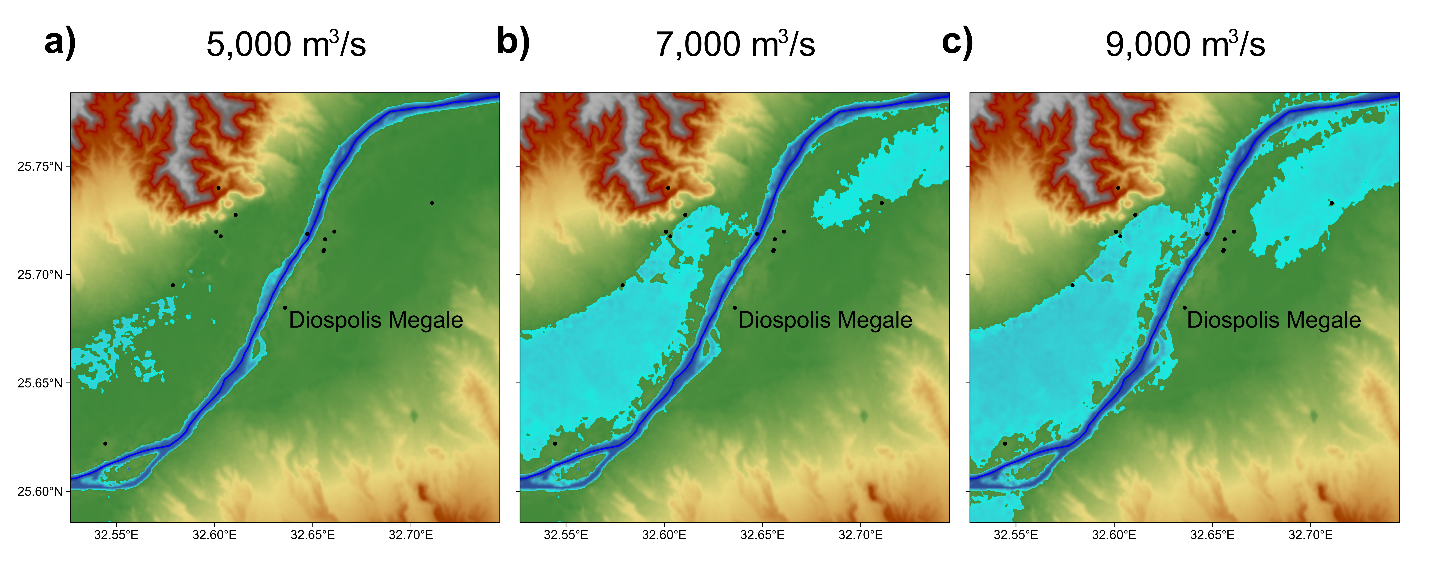
**

**Fig. E9.** Similar to Fig. 3, showing the region around Diospolis Megale, modern Thebes.

**
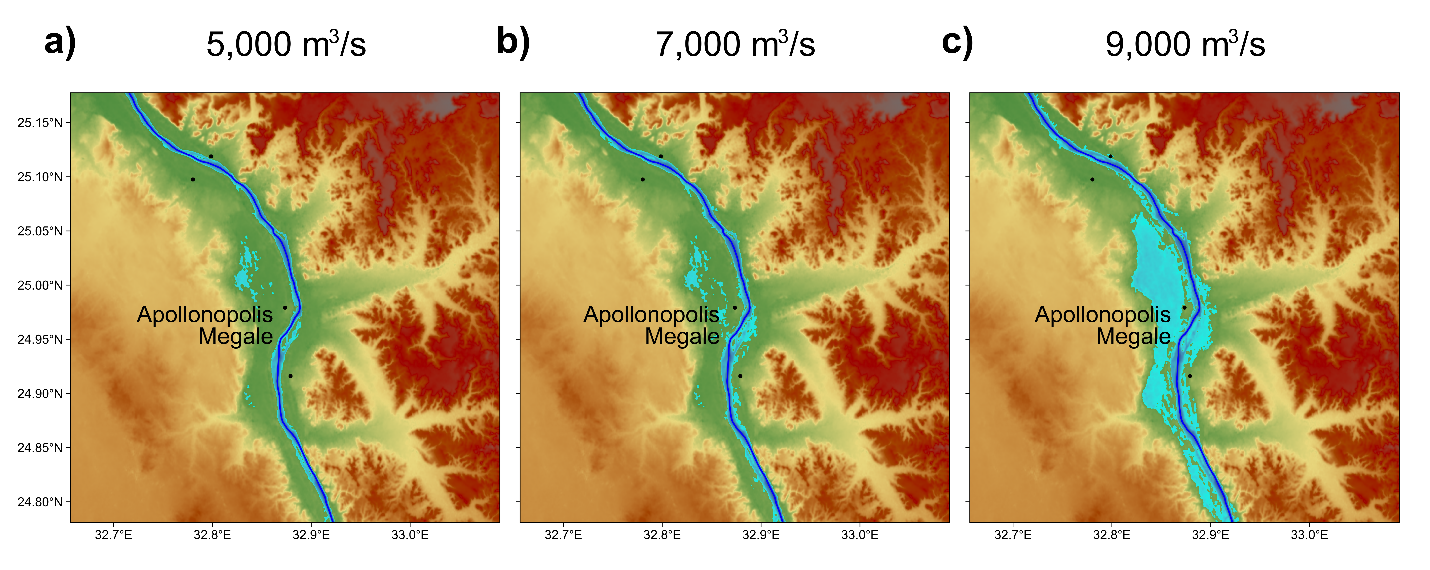
**

**Fig. E10.** Similar to Fig. 3, showing the region around Apollonopolis Megale, modern Edfu.
